# Supplementary material for: Interactions between uranium(vi) and phosphopeptide: experimental and theoretical investigations
Source: Royal Society of Chemistry journal article supplement (doi:10.1039/c6dt03009b), 2016-01-01
Supplement: c6dt03009b1.pdf [file c6dt03009b1.pdf]

## Electronic Supplementary Information

### Interactions Between Uranium(VI) and Phosphopeptide: Experimental and Theoretical Investigations

Qun-Yan Wu,<sup>‡a</sup> Fu-Wan Zhai,<sup>‡a</sup> Yang Liu,<sup>a</sup> Li-Yong Yuan,<sup>\*a</sup> Zhi-Fang Chai,<sup>a,b</sup> Wei-

Qun Shi<sup>\*a</sup>

<sup>a</sup>Laboratory of Nuclear Energy Chemistry and Key Laboratory for Biomedical Effects  
of Nanomaterials and Nanosafety, Institute of High Energy Physics, Chinese  
Academy of Sciences, Beijing 100049, China

<sup>b</sup>School of Radiological and Interdisciplinary Sciences (RAD-X) and Collaborative  
Innovation Center of Radiation Medicine of Jiangsu Higher Education Institutions,  
Soochow University, Suzhou 215123, China

Corresponding Author

E-mail: shiwq@ihep.ac.cn, yuanly@ihep.ac.cn

‡These authors contributed equally to this work.

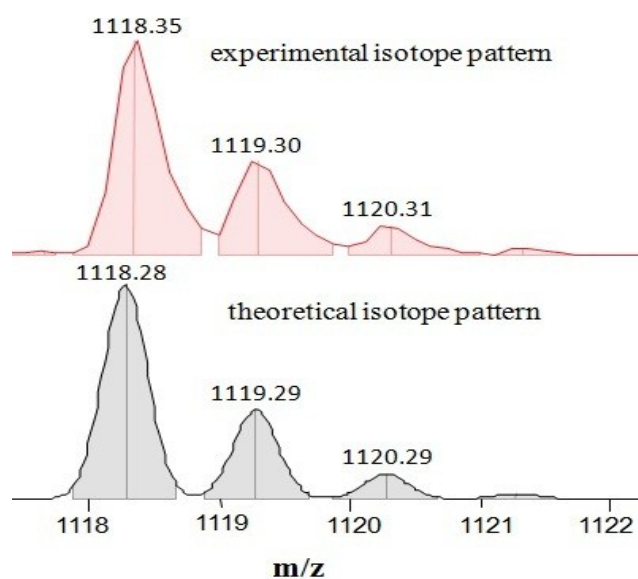

**Fig. S1** Experimental and theoretical isotope patterns of 1:1 U(VI)-P<sup>1</sup> ( [P<sup>1</sup>+UO<sub>2</sub><sup>2+</sup>-H<sup>+</sup>]<sup>+</sup>, m/z = 1118.3) complex, detected by ES<sup>+</sup>-MS.

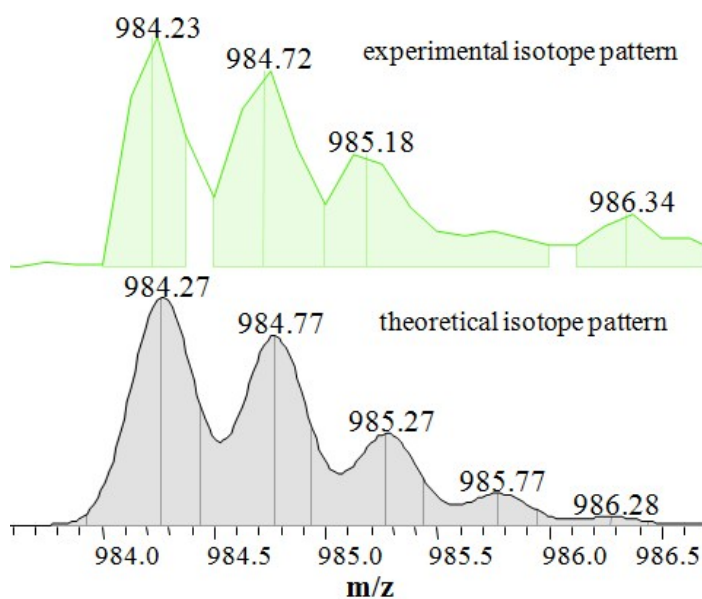

**Fig. S2** Experimental and theoretical isotope patterns of 1:2 U(VI)-P<sup>1</sup> ( [2P<sup>1</sup>+UO<sub>2</sub><sup>2+</sup>]<sup>2+</sup>, m/z = 984.2 ) complex, detected by ES<sup>+</sup>-MS.

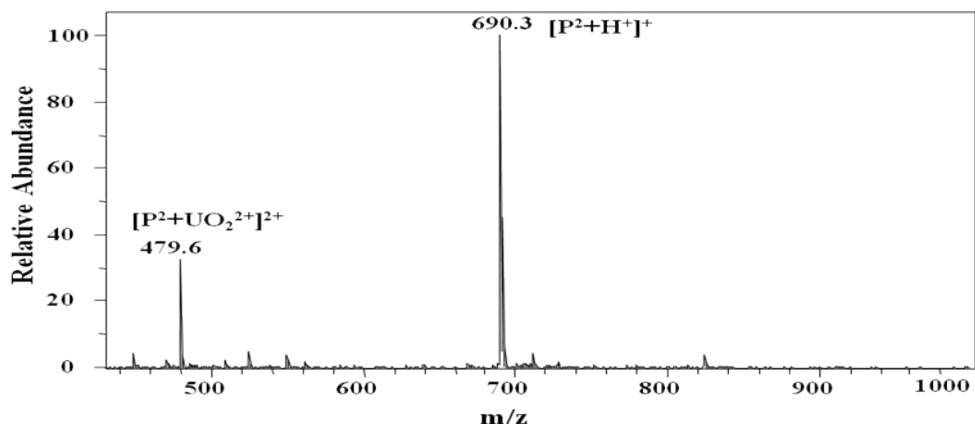

**Fig. S3** ESI mass spectrum of the solution containing  $P^2$  ( $25 \mu\text{M}$ ) and 5.0 equiv.  $\text{UO}_2(\text{NO}_3)_2$  in  $\text{AcONH}_4$  buffer (5 mM, pH 7.0).

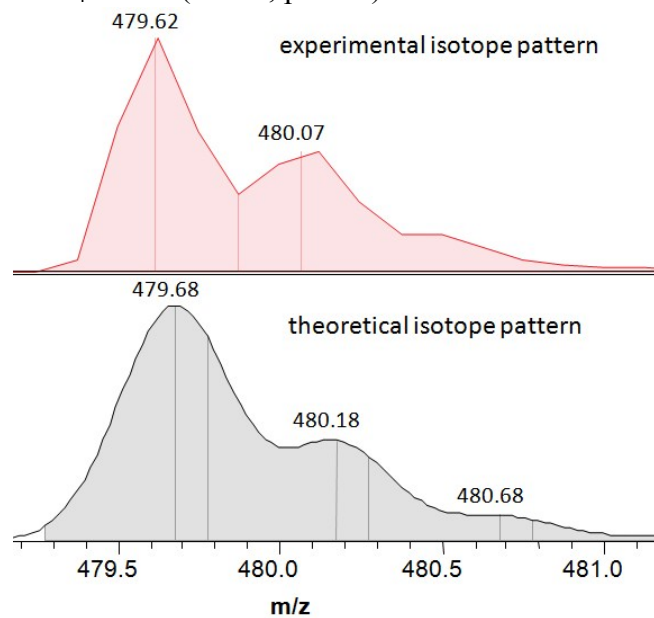

**Fig. S4** Experimental and theoretical isotope patterns of U(VI)- $P^2$  1:1 ( $[\text{P}^2+\text{UO}_2^{2+}]^{2+}$ ,  $m/z = 479.6$ ) complex, detected by  $\text{ES}^+$ -MS.

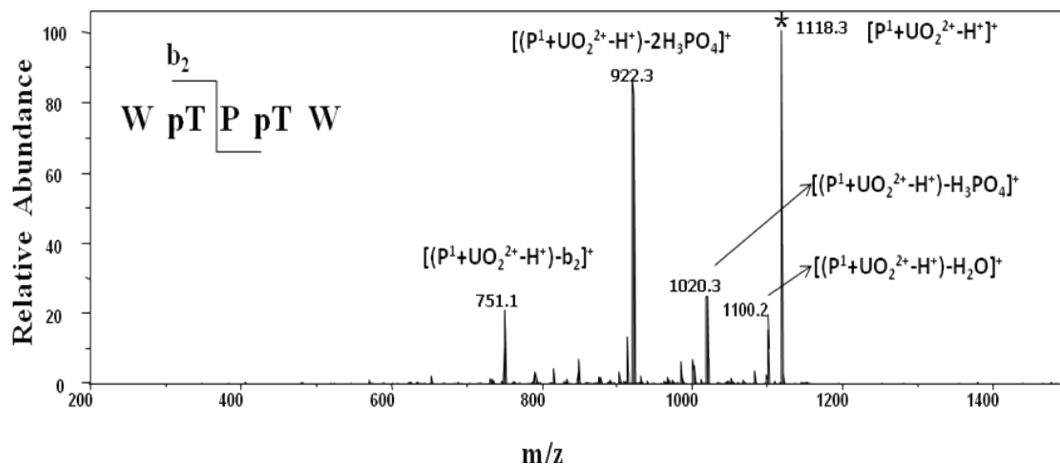

**Fig. S5** Collision induced dissociation spectrum of the monocation U(VI)-P<sup>1</sup> 1:1 complex ( $[P^1+UO_2^{2+}-H^+]^+$ ,  $m/z = 1118.3$ ).

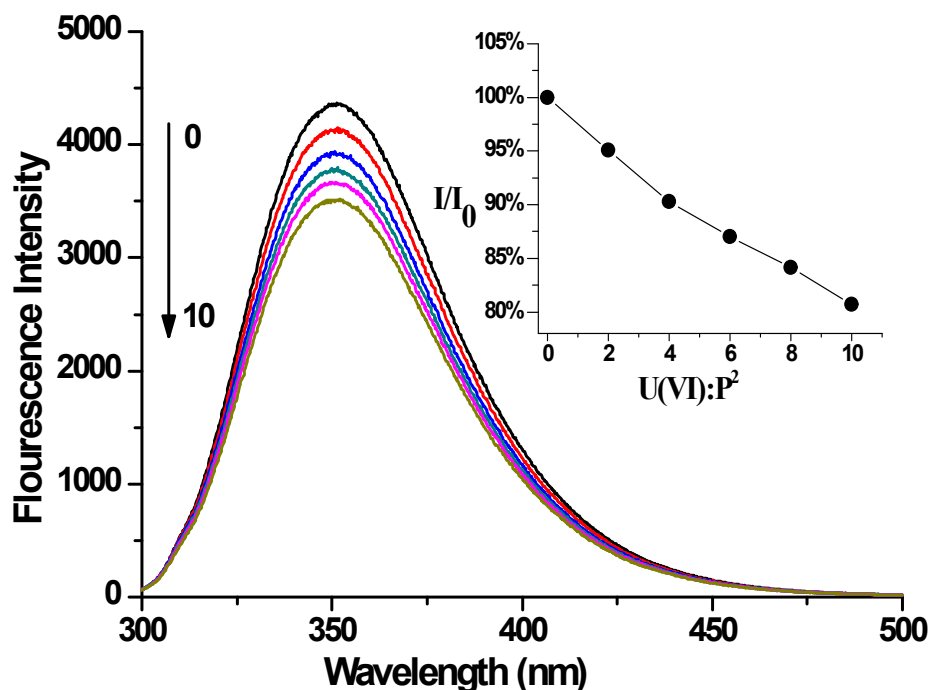

**Fig. S6** Fluorescence emission spectra of 20  $\mu\text{M}$  P<sup>2</sup> in the absence and presence of increasing concentrations of uranyl nitrate (0 to 200  $\mu\text{M}$ ). Measured at pH 4.0, HEPES buffer 10 mM, NaClO<sub>4</sub> 0.1 M, 25 °C with  $\lambda_{\text{ex}} = 280$  nm. Insert: plots of fluorescence variations at 352 nm expressed as  $I/I_0$  over equivalent U(VI) additions.  $I_0$  is the fluorescence intensity of the P<sup>2</sup> and  $I$  the fluorescence intensities of the resulting U(VI)-P<sup>2</sup> complex.

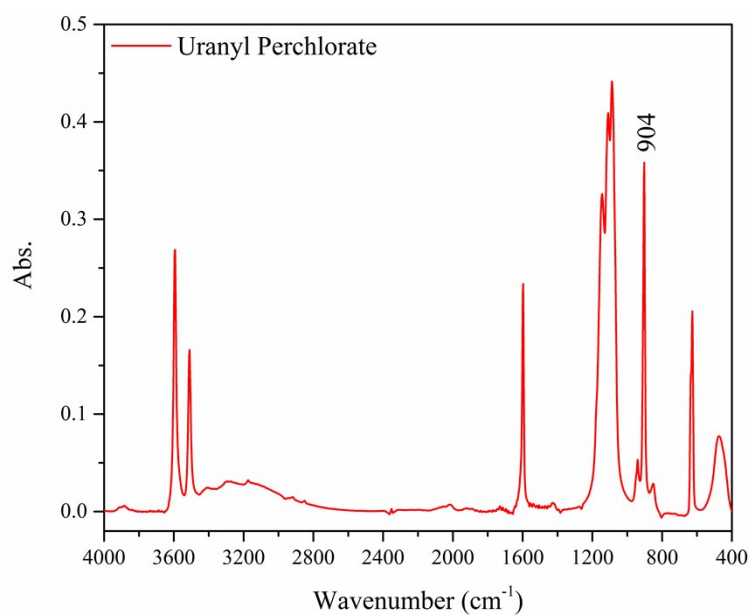

**Fig. S7** FT-IR spectra of  $\text{UO}_2(\text{ClO}_4)_2$

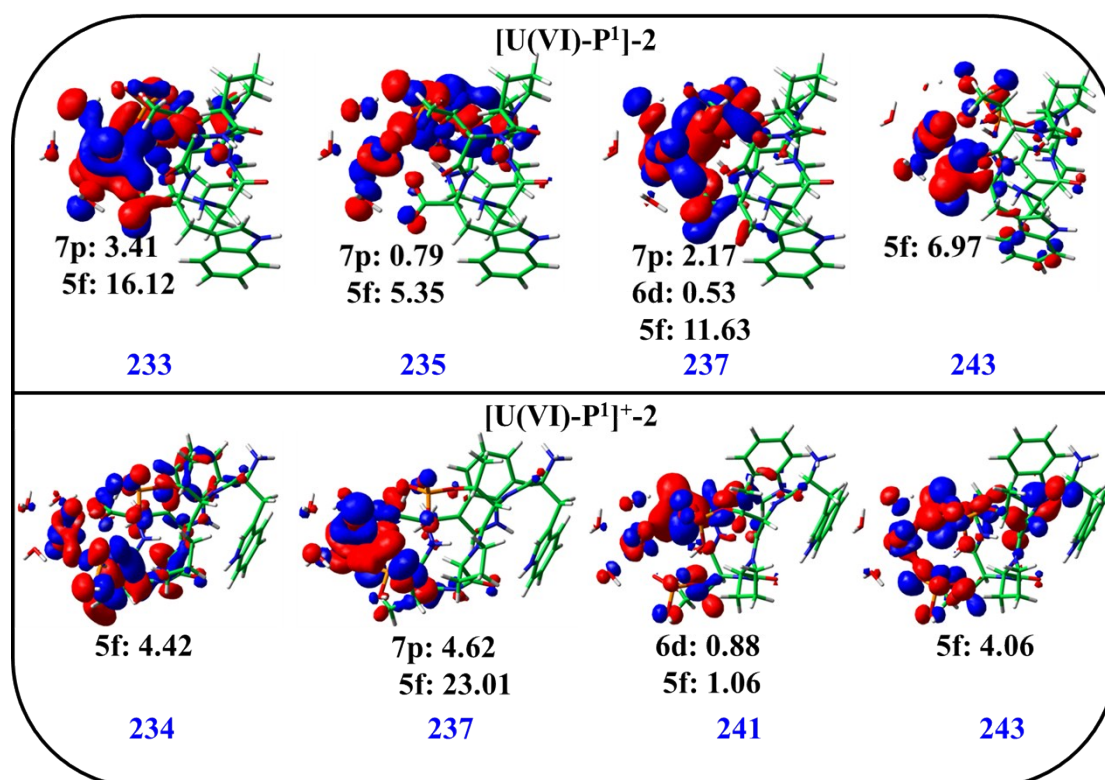

**Fig. S8** The MO diagrams relevant to U(VI) ions and P<sup>1</sup> for complexes [U(VI)-P<sup>1</sup>]-2 and [U(VI)-P<sup>1</sup>]<sup>+</sup>-2. The isosurface value of the MOs is set to be 0.02 au. The uranium atom composition of the corresponding MOs is also provided.

**Table S1** The total electronic energy of six U(VI)-P<sup>1</sup> complexes in the gas phase (E<sub>gas</sub>, au) at the B3LYP/6-31G(d)/RECP level of theory and the aqueous phase (E<sub>sol</sub>, au) at the B3LYP/6-311+G (d)/RECP/SMD level of theory, respectively.

| Complexes                               | E <sub>gas</sub> | E <sub>sol</sub> |
|-----------------------------------------|------------------|------------------|
| [U(VI)-P <sup>1</sup> ]-1               | -4335.997915     | -4337.134684     |
| [U(VI)-P <sup>1</sup> ]-2               | -4335.992684     | -4337.142997     |
| [U(VI)-P <sup>1</sup> ]-3               | -4335.992555     | -4337.137158     |
| [U(VI)-P <sup>1</sup> ] <sup>+</sup> -1 | -4336.412194     | -4337.593993     |
| [U(VI)-P <sup>1</sup> ] <sup>+</sup> -2 | -4336.389231     | -4337.594933     |
| [U(VI)-P <sup>1</sup> ] <sup>+</sup> -3 | -4336.387694     | -4337.572391     |

**Table S2** Calculated NBO populations (s, p, d and f) and natural charges on the uranium atom at the B3LYP/6-31G(d)/RECP level of theory.

| Complexes                               | 7s   | 7p   | 6d   | 5f   | Q <sub>U</sub> |
|-----------------------------------------|------|------|------|------|----------------|
| [U(VI)-P <sup>1</sup> ]-1               | 0.19 | 0.37 | 1.39 | 2.56 | 1.58           |
| [U(VI)-P <sup>1</sup> ]-2               | 0.19 | 0.38 | 1.41 | 2.57 | 1.55           |
| [U(VI)-P <sup>1</sup> ]-3               | 0.18 | 0.39 | 1.42 | 2.58 | 1.52           |
| [U(VI)-P <sup>1</sup> ] <sup>+</sup> -1 | 0.18 | 0.37 | 1.41 | 2.57 | 1.59           |
| [U(VI)-P <sup>1</sup> ] <sup>+</sup> -2 | 0.18 | 0.36 | 1.39 | 2.57 | 1.61           |
| [U(VI)-P <sup>1</sup> ] <sup>+</sup> -3 | 0.18 | 0.36 | 1.38 | 2.55 | 1.66           |
